# Supplementary material
Source: publisher figshare collection journal article supplement (https://acs.figshare.com/ndownloader/files/3935851)
Supplement: Supplementary file 1 [file 3935851]

# Enhancing ordering dynamics in solvent-annealed block-copolymer films by lithographic hard masks supports

Anja Stenbock<sup>†</sup>, Armin. Knoll<sup>‡</sup>, Alexander Böker<sup>†\*</sup>, Larisa Tsarkova<sup>†\*</sup>,

<sup>†</sup>DWI – Leibniz Institute for Interactive Materials, Forckenbeckstraße 50, 52056, Aachen  
Germany

<sup>‡</sup>IBM Research—Zurich, Säumerstrasse 4, CH-8803 Rüschlikon, Switzerland

\*Authors to whom correspondence should be addressed. E-mail: boker@dwil.rwth-aachen.de; tsarkova@dwil-rwth-aachen.de

## SUPPORTING INFORMATION

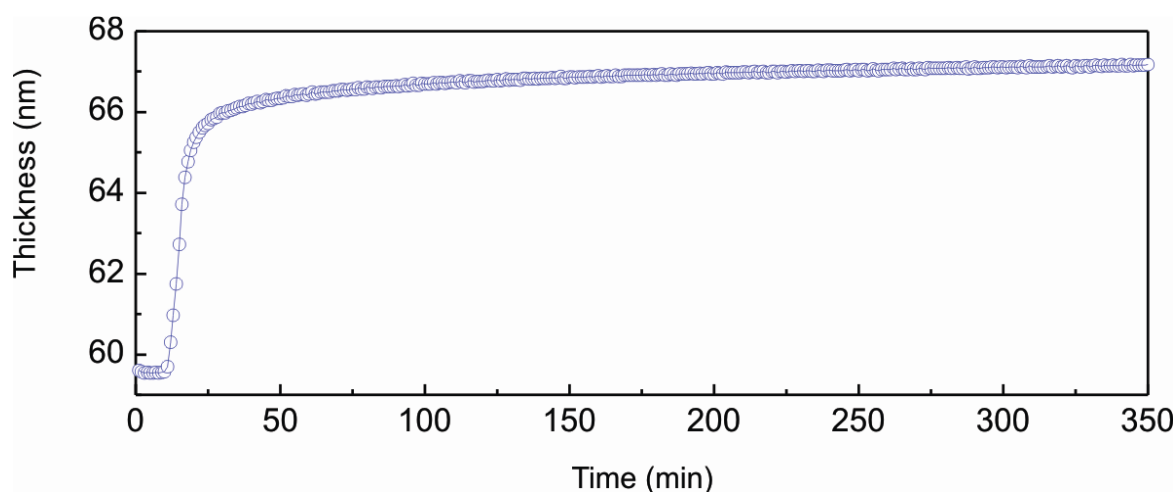

**Figure S1:** Kinetics of swelling upon long-term annealing of HM-layer on silicon wafer under 20% of the partial vapor pressure of chloroform  $p/p_0$ . The plot indicates a steady slow increase of the swollen thickness even upon almost 6 h of annealing.

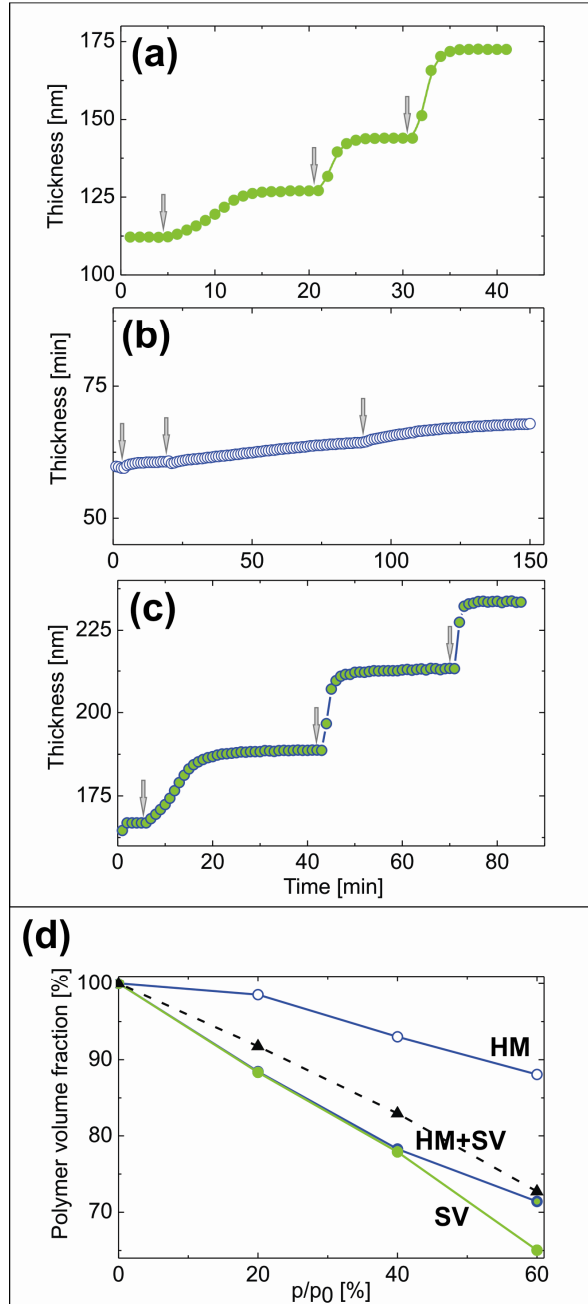

**Figure S2:** Kinetics of swelling upon step-wise increase of the partial vapor pressure  $p/p_0$  of chloroform (as indicated by arrows from left to right) to 20, 40 and 60 % of (a) a 115 nm-thick SV film on a silicon wafer, (b) HM-layer on a silicon wafer, and (c) a 166 nm-thick bilayer sample (SV-film on HM-support). (d) Comparison of the swelling behavior evaluated from the corresponding swelling curves in (a-c) and expressed as a polymer volume fraction  $\phi_p$  versus  $p/p_0$  for HM-layer (empty circles), for SV film on silicon substrate (solid circles) and SV film on HM-support (Blue-green solid circles). Triangles indicate calculated values assuming a summation of the degrees of swelling of respective layers.

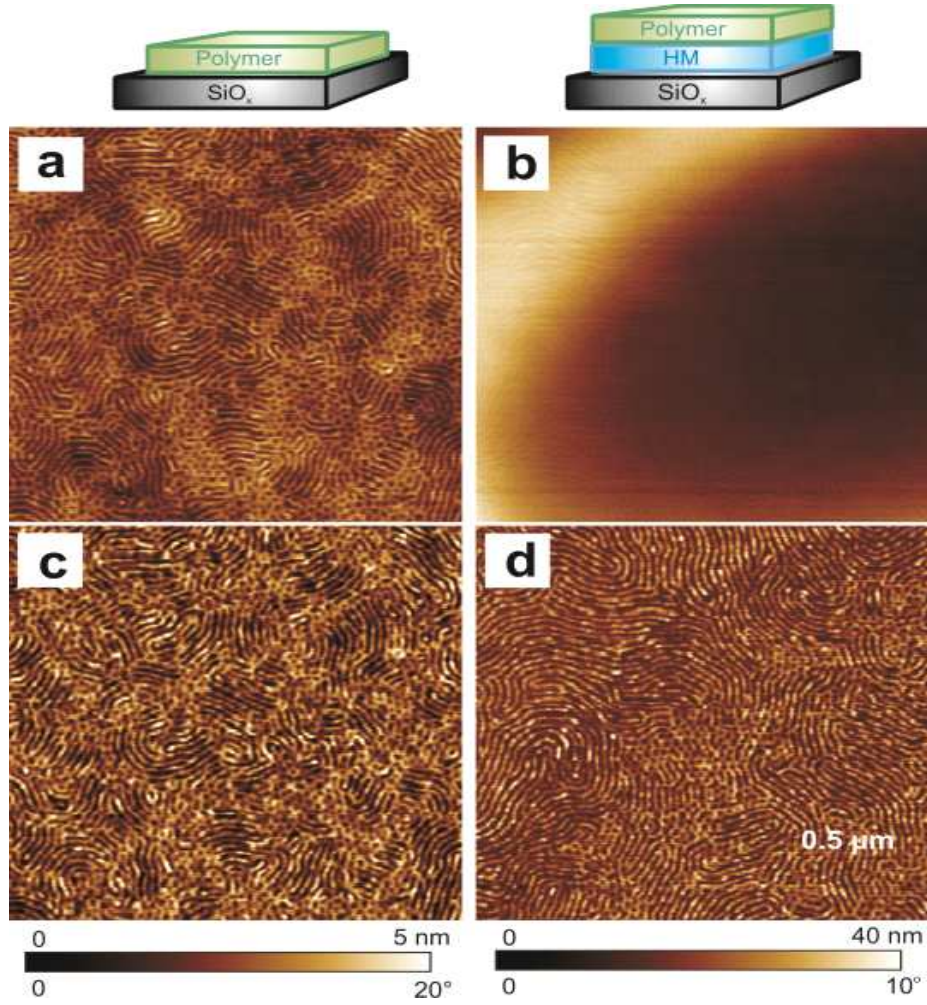

**S3:** SFM topography (a,b) and phase (c,d) images of the microphase separated structures in ~40 nm-thick SB films as in Figure 7(c-d) annealed on silicon substrate (a,c) and on HM-support (b-d). The films have been annealed for 10 min in chloroform vapor under standard thermal and flow conditions at 60% of  $p/p_0$  resulting in  $\phi_p$  of  $0.71 \pm 0.02$ . The images reveal coexisting  $C_{\parallel}$  and PL phases on silica substrate and of PL phase in terrace  $T_1$  and  $C_{\parallel}$  phase in terrace  $T_2$  on HM-support.
